# Supplementary material
Source: Springer Nature journal article supplement (https://www.springermedizin.de/resource/supplementary/12943_2014_1387_MOESM3_ESM.pdf/9552862)

# Additional file 3: Figure S3

**A**

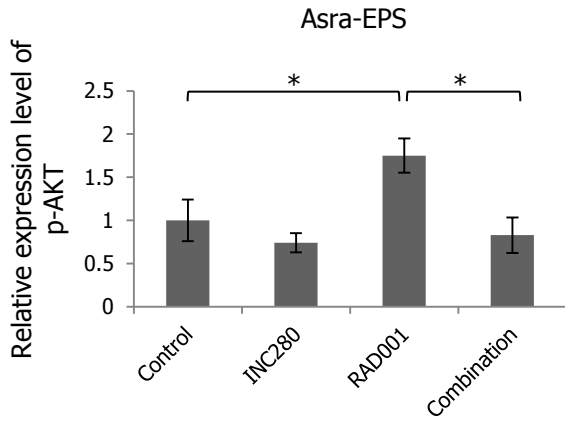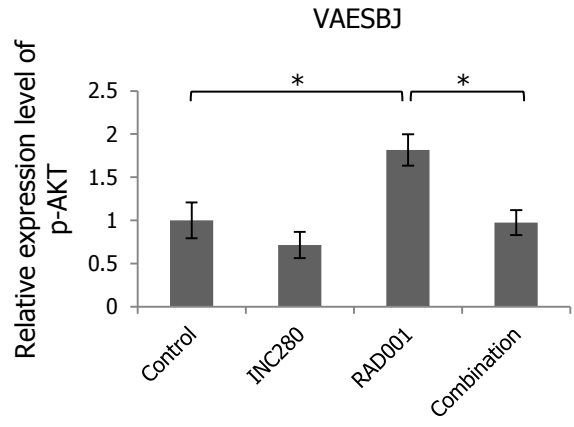

**B**

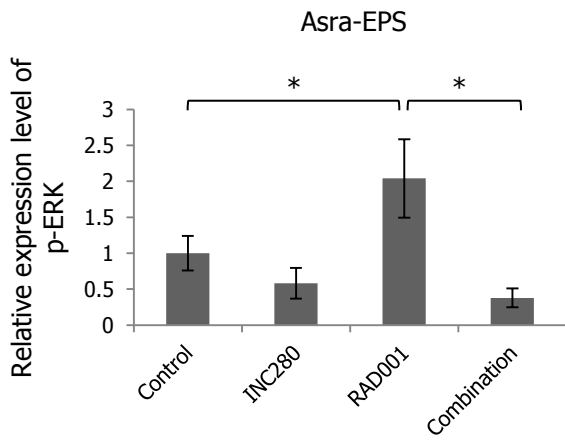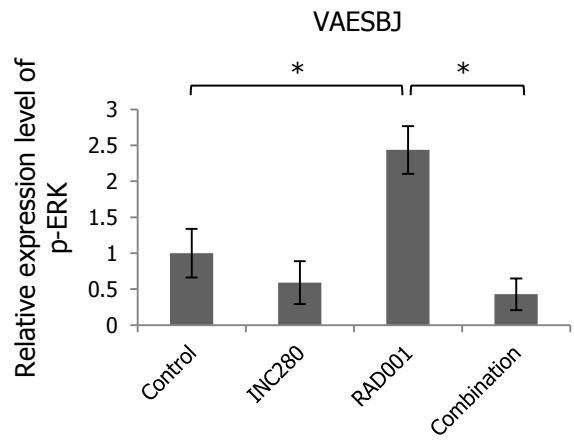

Supplement: MOESM3 [file 9552862]
